# Supplementary material for: How to Survive Intensive Harvesting: The High Recruitment Rates of the Precious Mediterranean Red Coral (Corallium rubrum L. 1758)
Source: MDPI journal article supplement (doi:10.3390/oceans4030021), 2023-08-27
Supplement: s1 [file s1]

## Supplementary materials

**Table S1.** Chi-square contingency table for the aggregation of recruits on the settlement tiles and on the natural substrate.

| Distribution     | Tiles | Natural substrate | Tot. | %    |
|------------------|-------|-------------------|------|------|
| Cluster          | 6     | 31                | 37   | 35.6 |
| Random           | 46    | 21                | 67   | 64.4 |
| Tot.             | 52    | 52                | 104  | 100  |
| X square = 53.07 | n=104 | p<0.001           |      |      |

**Table S2.** Recruit density of other octocorals extracted from literature.

| Species                              | Reproduction         | Recruit density<br>(col dm <sup>-2</sup> )         | Location                    | References                           |
|--------------------------------------|----------------------|----------------------------------------------------|-----------------------------|--------------------------------------|
| <i>Muricea californica</i>           | Internal brooder     | 0.0064-0.0018                                      | California                  | Grigg 1977 [58]                      |
| <i>Muricea fruticosa</i>             | Internal brooder     | 0.00334-0.0004                                     | California                  | Grigg 1977 [58]                      |
| <i>Leptogorgia virgulata</i>         | Broadcast<br>spawner | 0.018-0.0025                                       | Gulf of Mexico              | Gotelli 1988 [59]                    |
| <i>Pseudopterogorgia sp.</i>         | Surface brooder      | 0.023-0.0023                                       | Puerto Rico                 | Yoshioka 1996 [60]                   |
| <i>Efflatounaria sp.</i>             | ND                   | 0.0037                                             | Great Barrier Reef (AU)     | Karlson et al. 1996 [61]             |
| <i>Plexaura kuna</i>                 | Broadcast<br>spawner | 0.0004-0.0002                                      | Panama                      | Lasker et al. 1998 [62]              |
| <i>Heliopora coerulea</i>            | Surface brooder      | 3.7-3.5                                            | RiuKiu Islands (JP)         | Harii and Kayanne 2003 [63]          |
| <i>Paramuricea clavata</i>           | Surface brooder      | 0.025± 0.1.0 (pre<br>mass-mortality)               | Portofino Ligurian Sea (It) | Cerrano et al. 2005 [64]             |
| <i>Paramuricea clavata</i>           | Surface brooder      | 0.048 ± 2.9 (after<br>mass-mortality)              | Portofino Ligurian Sea (It) | Cerrano et al. 2005 [64]             |
| <i>Paramuricea clavata</i>           | Surface brooder      | 0.026 ± 0.005 (pre<br>mass-mortality)              | Spezia Ligurian Sea (It.)   | Cupido et al. 2009 [7]               |
| <i>Paramuricea clavata</i>           | Surface brooder      | 0.041 ± 0.47 (8 years<br>since mass-<br>mortality) | Spezia Ligurian Sea (It.)   | Cupido et al. 2012 [65]              |
| <i>Paramuricea clavata</i>           | Surface brooder      | 0.037±1.7 (12 years<br>since mass-<br>mortality)   | Spezia Ligurian Sea (It.)   | Ruffaldi et al. 2021 [9]             |
| <i>Antillogorgia<br/>americana</i>   | Broadcast<br>spawner | 0.0004                                             | Bahamas                     | Lasker and Porto-Hannes 2021<br>[66] |
| <i>Antillogorgia acerosa</i>         | Broadcast<br>spawner | 0.0002                                             | Bahamas                     | Lasker and Porto-Hannes 2021<br>[66] |
| <i>Antillogorgia bipinnata</i>       | Surface brooder      | 0.0216                                             | Bahamas                     | Lasker and Porto-Hannes 2021<br>[66] |
| <i>Antillogorgia<br/>elisabethae</i> | Surface brooder      | 0.0273                                             | Bahamas                     | Lasker and Porto-Hannes 2021<br>[66] |
| <i>Antillogorgia istrix</i>          | Internal brooder     | 0.0304                                             | Bahamas                     | Lasker and Porto-Hannes 2021<br>[66] |
| <i>Antillogorgia rigida</i>          | ND                   | 0.0001                                             | Bahamas                     | Lasker and Porto-Hannes 2021<br>[66] |
